# Supplementary material for: Development and Deployment of the OpenMRS-Ebola Electronic Health Record System for an Ebola Treatment Center in Sierra Leone
Source: PubMed Central journal article supplement (PMC5583502; doi:10.2196/jmir.7881), 2017-08-21
Supplement: jmir_v19i8e294_app2.pdf [file jmir_v19i8e294_app2.pdf]

# **Development and deployment of the OpenMRS-Ebola Electronic Health Record System for an Ebola Treatment Centre In Sierra Leone**

Shefali Oza, Darius Jazayeri, Jonathan M. Teich, Ellen Ball, Patricia Nankubuge, Job Rwebembera, Kevin Wing, Alieu Sesay, Andrew S. Kanter, Glauber Ramos, David Walton, Rachael Cummings, Francesco Checchi, Hamish Fraser

## **Multimedia appendix 2:**

Complete screenshots of the tablet-based OpenMRS-Ebola application

Primary use – Red (infectious) zone of Ebola Treatment Center

# Tablet: team and ward selection

devtest03.openmrs.org:8080/openmrs/ms/uiframework/

Login

TEAM *(Select one)*

Team1 Team2 Team3 Team4

Team5 Team6

PRESCRIBER ID NUMBER

C

devtest03.openmrs.org:8080/openmrs/ms/uiframework/

Please select a ward Logout

Suspect Wards

Suspect Ward 1  
6 patients

Suspect Ward 2  
2 patients

Suspect Ward 3  
0 patients

Confirmed Wards

Confirmed Ward 1  
5 patients

Confirmed Ward 2  
5 patients

Confirmed Ward 3  
1 patients

Confirmed Ward 4  
0 patients

Confirmed Ward 5  
1 patients

Confirmed Ward 6  
0 patients

Recovery Wards

Recovery Ward 1  
0 patients

Test Ward 1  
0 patients

# Tablet: patient selection and summary

devtest03.openmrs.org:8080/openmrs/ms/uiframework/1

[Back](#) Please select a patient *Suspect Ward 1*

|                                                |                                                 |
|------------------------------------------------|-------------------------------------------------|
| <b>Joseph Manzaray</b><br>KT-2-02345<br>Bed #1 | <b>Asdf Asdfadfasdf</b><br>KT-0-13423<br>Bed #6 |
| <b>Martin Liu</b><br>KT-3-90191<br>Bed #2      | <b>Mary Andama</b><br>KT-3-00015<br>Bed #7      |
| <b>Kirsty Porter</b><br>KT-2-03040<br>Bed #3   | <b>Osama Shoiup</b><br>KT-1-12345<br>Bed #8     |

[Suspect Ward 1](#) [Actions](#)

PATIENT ID: **KT-0-13423** NAME: **asdf asdfadfasdf** GENDER - AGE: **F - 30** BED WARD: **6 Susp 1**

**Vitals** [Capture vitals](#)

|              |         |            |           |         |                    |           |
|--------------|---------|------------|-----------|---------|--------------------|-----------|
| 31 Mar 23:07 | AVPU: V | T: 33.3 °C | Pulse: 20 | Resp: - | O <sub>2</sub> : - | BP: - / - |
| 31 Mar 23:04 | AVPU: U | T: 33.4 °C | Pulse: -  | Resp: - | O <sub>2</sub> : - | BP: - / - |

**Symptoms** [Capture symptoms](#)

|              |                                                                    |
|--------------|--------------------------------------------------------------------|
| 31 Mar 23:04 | Short of breath<br>Diarrhoea, Nose/Mouth bleeding, Urine bleeding, |
| 26 Mar 13:04 | Confusion, Head pain                                               |

**Active Prescriptions** [Show All](#)

**AMOXICILLIN** Amoxicillin 250mg/5mL Powder for Suspension 100 mL  
( 13 Mar 13:26 ) 1 mg Oral each Afternoon - Never administered (prescribed by: Super User)

[Administer](#) [Edit](#) [Stop](#)

**IV Fluids** [Show All](#)

**PHOSPHATE POLYFUSOR** @ 100 mL/hr IV for 2 hours  
(ordered 17 Mar 16:35 by Super User) - STARTED: 17 Mar 16:35

[Start](#) [Restart](#)  
[Hold](#) [Stop](#)

**DEXTROSE 5% IN NORMAL SALINE** @ 75 mL/hr IV for 4 hours  
(ordered 17 Mar 16:36 by Super User) - NOT STARTED

[Start](#) [Restart](#)  
[Hold](#) [Stop](#)

Note: All patients and data included here are fictitious

# Tablet: action menu

The screenshot displays a mobile application interface for a patient record. The browser address bar shows the URL: devtest03.openmrs.org:8080/openmrs/ms/uiframework/1. The patient record is titled "Suspect Ward 1" and includes the following information:

- PATIENT ID:** KT-0-13423
- NAME:** asdf asdfasdf
- GENDER - AGE:** F - 30

The record is divided into several sections:

- Vitals:** Includes "Capture vitals" and two entries:
  - 31 Mar 23:07 AVPU: V T: 33.3°C Pulse: 20 Re
  - 31 Mar 23:04 AVPU: U T: 33.4°C Pulse: - Re
- Symptoms:** Includes "Capture symptoms" and three entries:
  - 31 Mar 23:04 Short of breath  
Diarrhoea, Nose/Mouth bleeding
  - 26 Mar 13:04 Confusion, Head pain
- Active Prescriptions:** Includes "Show All" and one entry:
  - AMOXICILLIN** Amoxicillin 250mg/5mL Powder for Suspension 100 mL  
( 13 Mar 13:26 ) 1 mg Oral each Afternoon - Never administered (prescribed by: Super User)
- IV Fluids:** Includes "Show All" and two entries:
  - PHOSPHATE POLYFUSOR** @ 100 mL/hr IV for 2  
(ordered 17 Mar 16:35 by Super User) - STARTED: 17 Mar
  - DEXTROSE 5% IN NORMAL SALINE** @ 75 mL  
for 4 hours  
(ordered 17 Mar 16:36 by Super User) - NOT STARTED

An "Actions" menu is overlaid on the right side of the screen, featuring a close button (X) and four options:

- Add new prescription
- Add IV fluid order
- Capture Vitals
- Capture Symptoms

# Tablet: drug selection

devtest03.openmrs.org:8080/openmrs/ms/uiframework/

PATIENT ID: **KT-0-13423** NAME: **asdf asdfadfasdf** GENDER - AGE: **F - 30** BED WARD: **6 Susp 1**

### New Prescription

|                                 |                    |
|---------------------------------|--------------------|
| AMOXICILLIN                     | METRONIDAZOLE      |
| AMOXICILLIN AND CLAVULANIC ACID | MORPHINE SULFATE   |
| ARTEMETHER-LUMEFANTRINE         | MULTIVITAMIN       |
| CEFIXIME                        | OMEPRAZOLE         |
| CEFTRIAXONE                     | ONDANSETRON        |
| CIPROFLOXACIN                   | PARACETAMOL        |
| DIAZEPAM                        | SODIUM BICARBONATE |
| GAVISCON                        | VITAMIN A          |
| HALOPERIDOL                     | VITAMIN K          |
| IVERMECTIN                      | ZINC SULFATE       |

Cancel

devtest03.openmrs.org:8080/openmrs/ms/uiframework/

PATIENT ID: **KT-0-13423** NAME: **asdf asdfadfasdf** GENDER - AGE: **F - 30** BED WARD: **6 Susp 1**

*Choose Formulation*

### Oral - Oral suspension

Amoxicillin 250mg/5mL Powder for Suspension 100 mL

### Oral - Capsule

Amoxicillin 500mg Capsules

Back

# Tablet: drug details

devtest03.openmrs.org:8080/openmrs/ms/uiframework/1

PATIENT ID: **KT-0-13423** NAME: **asdf asdfasdf** GENDER - AGE: **F - 30** BED WARD: **6 Susp 1**

**AMOXICILLIN** *Amoxicillin 500mg Capsules*

**ROUTE** *(Required)*

Oral

**DOSE** *(Required, >0)*

tablet(s)

**DOSING**

OR

**TIME OF DAY** *(Select one or more)*

**DURATION** *(Optional, >0)*

days

**OPTIONS**

PRN

# Tablet: drug administration

The screenshot displays a medical software interface for drug administration. At the top, a navigation bar shows a back arrow, the text "Suspect Ward 1", and an "Actions" menu icon. Below this, patient information is displayed: "PATIENT ID: KT-0-13423", "NAME: asdf asdfasdf", "GENDER - AGE: F - 30", "BED: 6", and "WARD: Susp 1".

The main content area is partially obscured by a modal window. The modal window title is "AMOXICILLIN Amoxicillin 250mg/5mL Powder for Suspension 100 mL" with a close button (X). Below the title, it says "1 mg by Oral each Afternoon". The modal prompts the user to "AMOUNT GIVEN (Select one)" and provides three buttons: "Fully Given", "Not Given", and "Partially Given". A yellow "Save" button is located at the bottom left of the modal.

In the background, under the "Active" section, there is an order for "AMOXICILLIN Suspension 100 mL" with a note: "( 13 Mar 13:26 ) 1 mg Oral each Afternoon - Never administered (prescribed by: Super User)". Below this order are buttons for "Administer", "Edit", and "Stop".

The "IV Fluids" section is visible below, with a "Show All" link. It lists two orders:

- PHOSPHATE POLYFUSOR** @ 100 mL/hr IV for 2 hours (ordered 17 Mar 16:35 by Super User) - STARTED: 17 Mar 16:35. Buttons: Start, Restart, Hold, Stop.
- DEXTROSE 5% IN NORMAL SALINE** @ 75 mL/hr IV for 4 hours (ordered 17 Mar 16:36 by Super User) - NOT STARTED. Buttons: Start, Restart, Hold, Stop.

# Tablet: IV fluid ordering

devtest03.openmrs.org:8080/openmrs/ms/uiframework/i

PATIENT ID: KT-0-13423 NAME: asdf asdfadfasdf GENDER - AGE: F - 30 BED WARD: 6 Susp 1

### New IV Fluid Order

|                                    |                              |
|------------------------------------|------------------------------|
| NORMAL SALINE                      | RINGER'S LACTATE             |
| NORMAL SALINE KCL 20 MMOL/L        | DEXTROSE 5% IN WATER         |
| NORMAL SALINE KCL 40 MMOL/L        | DEXTROSE 10% IN WATER        |
| PHOSPHATE POLYFUSOR                | DEXTROSE 5% IN NORMAL SALINE |
| SODIUM BICARBONATE 1.26% POLYFUSOR |                              |

Cancel

devtest03.openmrs.org:8080/openmrs/ms/uiframework/i

PATIENT ID: KT-0-13423 NAME: asdf asdfadfasdf GENDER - AGE: F - 30 BED WARD: 6 Susp 1

### Normal Saline

IV  Bolus **Infusion**

Infusion Rate (select one)

|           |           |           |           |
|-----------|-----------|-----------|-----------|
| KVO       | 50 mL/hr  | 75 mL/hr  | 100 mL/hr |
| 125 mL/hr | 150 mL/hr | 200 mL/hr | 500 mL/hr |

for (select one)

|            |       |        |        |
|------------|-------|--------|--------|
| Continuous | 1 hr  | 2 hrs  | 4 hrs  |
| 6 hrs      | 8 hrs | 12 hrs | 24 hrs |

### Comments

Back **Save**



# Tablet: IV fluid monitoring

devtest03.openmrs.org:8080/openmrs/ms/uiframework/1

**< Suspect Ward 1** **≡ Actions**

PATIENT ID: **KT-0-13423** NAME: **asdf asdfadfasdf** GENDER - AGE: **F - 30** BED: **6** WARD: **Susp 1**

**STARTED D5 in normal saline**

**Vitals** [Capture vitals](#)

|              |         |            |           |         |                    |           |
|--------------|---------|------------|-----------|---------|--------------------|-----------|
| 31 Mar 23:07 | AVPU: V | T: 33.3 °C | Pulse: 20 | Resp: - | O <sub>2</sub> : - | BP: - / - |
| 31 Mar 23:04 | AVPU: U | T: 33.4 °C | Pulse: -  | Resp: - | O <sub>2</sub> : - | BP: - / - |

**Symptoms** [Capture symptoms](#)

|              |                                                                    |
|--------------|--------------------------------------------------------------------|
| 31 Mar 23:04 | Short of breath<br>Diarrhoea, Nose/Mouth bleeding, Urine bleeding, |
| 26 Mar 13:04 | Confusion, Head pain                                               |

**Active Prescriptions** [Show All](#)

**AMOXICILLIN** Amoxicillin 250mg/5mL Powder for Suspension 100 mL  
( 13 Mar 13:26 ) 1 mg Oral each Afternoon - Never administered (prescribed by: Super User)

**Administer** **Edit** **Stop**

**IV Fluids** [Show All](#)

|                                                                                                                              |              |                |
|------------------------------------------------------------------------------------------------------------------------------|--------------|----------------|
| <b>PHOSPHATE POLYFUSOR</b> @ 100 mL/hr IV for 2 hours<br>(ordered 17 Mar 16:35 by Super User) - HELD: 7 Apr 14:09            | <b>Start</b> | <b>Restart</b> |
|                                                                                                                              | <b>Hold</b>  | <b>Stop</b>    |
| <b>DEXTROSE 5% IN NORMAL SALINE</b> @ 75 mL/hr IV for 4 hours<br>(ordered 17 Mar 16:36 by Super User) - STARTED: 7 Apr 14:10 | <b>Start</b> | <b>Restart</b> |
|                                                                                                                              | <b>Hold</b>  | <b>Stop</b>    |

# Tablet: vitals and symptoms

devtest03.openmrs.org:8080/openmrs/ms/uiframework/i

PATIENT ID: KT-0-13423 NAME: asdf asdfadfasdf GENDER - AGE: F - 30 BED WARD: 6 Susp 1

### CURRENT CONSCIOUSNESS

A V P U

Temp:  °C

Pulse:  beats/min

Resp. Rate:  breaths/min

O2 Sat:  %

Blood Pressure:  mmHg /  mmHg

Cancel Save

devtest03.openmrs.org:8080/openmrs/ms/uiframework/i

PATIENT ID: KT-0-13423 NAME: asdf asdfadfasdf GENDER - AGE: F - 30 BED WARD: 6 Susp 1

### SYMPTOMS *(select appropriate option)*

General: Confusion, Fatigue, Dehydration, Rash, Pallor

Pain: Head, Muscle/Joint, Chest, Abdomen

Resp: Short of breath, Cough, Hiccups

GI: Diarrhoea, Vomiting, Nausea

Bleeding: Nose/Mouth, Vomitus, Cough, IV Site, Stool, Vagina, Urine

Stage: 1 - Early/Dry, 2 - GI/Wet, 3 - Severe

Cancel Save
